# Supplementary material for: Development of Machine-Learning Models for Tinnitus-Related Distress Classification Using Wavelet-Transformed Auditory Evoked Potential Signals and Clinical Data
Source: MDPI journal article supplement (doi:10.3390/jcm12113843), 2023-06-04
Supplement: s1 [file s1]

**Table S1.** The 33 Selected Clinical variables.

|    | Name                 | Description                                                                                                                                        | Range of Values                                                                                                                                                 |
|----|----------------------|----------------------------------------------------------------------------------------------------------------------------------------------------|-----------------------------------------------------------------------------------------------------------------------------------------------------------------|
| 1  | Age                  | Individual's age                                                                                                                                   | Numeric                                                                                                                                                         |
| 2  | Height               | Individual's height                                                                                                                                | Numeric                                                                                                                                                         |
| 3  | Weight               | Individual's weight                                                                                                                                | Numeric                                                                                                                                                         |
| 4  | Alcohol              | The average number of alcoholic drinks that the individual consumes per week<br>(1 drink = 125 ml glass of wine, 330 ml of beer, 40 ml of spirits) | Numeric                                                                                                                                                         |
| 5  | Tinnitus time        | The number of months that the individual has experienced tinnitus                                                                                  | Numeric                                                                                                                                                         |
| 6  | Tinnitus bother time | The length of time the individual has been bothered by tinnitus (in months)                                                                        | Numeric                                                                                                                                                         |
| 7  | Hearing loss 250     | Ear's hearing loss at 250 Hz                                                                                                                       | Numeric                                                                                                                                                         |
| 8  | Hearing loss 500     | Ear's hearing loss at 500 Hz                                                                                                                       | Numeric                                                                                                                                                         |
| 9  | Hearing loss 1000    | Ear's hearing loss at 1 kHz                                                                                                                        | Numeric                                                                                                                                                         |
| 10 | Hearing loss 2000    | Ear's hearing loss at 2 kHz                                                                                                                        | Numeric                                                                                                                                                         |
| 11 | Hearing loss 3000    | Ear's hearing loss at 3 kHz                                                                                                                        | Numeric                                                                                                                                                         |
| 12 | Hearing loss 4000    | Ear's hearing loss at 4 kHz                                                                                                                        | Numeric                                                                                                                                                         |
| 13 | Hearing loss 6000    | Ear's hearing loss at 6 kHz                                                                                                                        | Numeric                                                                                                                                                         |
| 14 | Hearing loss 8000    | Ear's hearing loss at 8 kHz                                                                                                                        | Numeric                                                                                                                                                         |
| 15 | Hearing loss         | Ear's hearing loss category                                                                                                                        | 0 = Normal hearing (0-20 dB HL)<br>1 = Mild hearing loss (21-60 dB HL)<br>2 = Severe hearing loss (61-x dB HL)                                                  |
| 16 | Gender               | Individual's gender                                                                                                                                | 1 = Female<br>2 = Male                                                                                                                                          |
| 17 | Family history       | Existence of a first-degree relative with tinnitus or hearing loss (parents, children, siblings)                                                   | 0 = No<br>1 = Yes                                                                                                                                               |
| 18 | Education            | The highest education level of the individual                                                                                                      | 1 = No school<br>2 = Primary (elementary school)<br>3 = Lower secondary (middle school)<br>4 = Upper secondary (high school)<br>5 = University or higher degree |
| 19 | Smoking              | Individual's smoking status                                                                                                                        | 1 = Never smoker<br>2 = Current smoker<br>3 = Ex-smoker                                                                                                         |
| 20 | Vertigo              | Individual's answer to whether they suffer from vertigo (sensation of spinning or tilting)                                                         | 1 = Never<br>2 = Yes, at least one episode per year<br>3 = Yes, less than one episode per year                                                                  |
| 21 | Frequency            | Individual's answer to how often they have tinnitus on average                                                                                     | 1 = Daily or almost daily<br>2 = Almost weekly<br>3 = Almost monthly<br>4 = Every few months<br>5 = Yearly                                                      |
| 22 | Day pattern          | Individual's answer to what best describes their tinnitus during the day                                                                           | 1 = Constant<br>2 = Intermittent                                                                                                                                |
| 23 | Number sounds        | Individual's answer to whether they hear one or more different sounds                                                                              | 1 = One sound<br>2 = More than one                                                                                                                              |
| 24 | Loudness changes     | Individual's answer to whether the loudness of their tinnitus is stable over time or fluctuates over a day                                         | 1 = Stable<br>2 = Sometimes fluctuating<br>3 = Always fluctuating                                                                                               |
| 25 | Sound quality        | Individual's answer to what their tinnitus sounds like                                                                                             | 1 = Tonal<br>2 = Noise like<br>3 = Music like<br>4 = Cricket<br>5 = Other                                                                                       |
| 26 | Pitch                | Tinnitus frequency                                                                                                                                 | 1 = < 4000kHz<br>2 = ≥ 4000kHz<br>3 = Combination of 1 and 2                                                                                                    |
| 27 | Localisation         | Individual's answer to where do they perceive their tinnitus                                                                                       | 0 = Unilateral (non-tinnitus side)<br>1 = Unilateral (tinnitus side)                                                                                            |

|    |                   |                                                           |                                                                                                                                                                                                                 |
|----|-------------------|-----------------------------------------------------------|-----------------------------------------------------------------------------------------------------------------------------------------------------------------------------------------------------------------|
|    |                   |                                                           | 2 = Bilateral<br>3 = Head<br>1 = No<br>2 = Yes, following heart beat<br>3 = Yes, following breathing<br>4 = Yes following movements of the head, neck, jaw or muscles of the face<br>5 = Other<br>0 = Pure tone |
| 28 | Rhythmic          | Individual's answer to whether their tinnitus is rhythmic |                                                                                                                                                                                                                 |
| 29 | Matching type     | Ear's tinnitus type                                       | 1 = Narrow band<br>2 = Broad band                                                                                                                                                                               |
| 30 | GUF               | Score on the GUF questionnaire                            | Numeric (0–45)                                                                                                                                                                                                  |
| 31 | Max Frequency     | Expressing the ear's maximal tinnitus frequency           | Numeric                                                                                                                                                                                                         |
| 32 | Matching loudness | Expressing the ear's tinnitus matching loudness in dB     | Numeric                                                                                                                                                                                                         |
| 33 | Minimal masking   | Expressing the ear's minimal masking level in dB          | Numeric                                                                                                                                                                                                         |

**Table S2.** Descriptive statistics regarding the tinnitus distress influence on ABR components.

|           | THI score |       |               | THI score |       |             | THI score |       |
|-----------|-----------|-------|---------------|-----------|-------|-------------|-----------|-------|
|           | ≥48       | <48   |               | ≥48       | <48   |             | ≥48       | <48   |
| Waveforms | 228       | 268   |               | 228       | 268   |             | 228       | 268   |
| Mean      | 1.48      | 1.54  |               | 3.62      | 3.72  |             | 5.46      | 5.59  |
| Median    | 1.45      | 1.52  | III latency   | 3.58      | 3.68  | V latency   | 5.38      | 5.55  |
| SD        | 0.32      | 0.37  |               | 0.27      | 0.31  |             | 0.46      | 0.46  |
| Minimum   | 0.7       | 0.72  |               | 2.9       | 2.92  |             | 4.52      | 4.52  |
| Maximum   | 2.48      | 2.5   |               | 4.45      | 4.5   |             | 6.82      | 7     |
| Mean      | 0.1       | 0.07  |               | 0.21      | 0.19  |             | 0.21      | 0.19  |
| Median    | 0.09      | 0.06  | III amplitude | 0.21      | 0.18  | V amplitude | 0.21      | 0.18  |
| SD        | 0.11      | 0.08  |               | 0.14      | 0.13  |             | 0.11      | 0.1   |
| Minimum   | -0.18     | -0.18 |               | -0.19     | -0.12 |             | -0.12     | -0.12 |
| Maximum   | 0.8       | 0.37  |               | 1.35      | 0.77  |             | 0.72      | 0.52  |

**Table S3.** Descriptive statistics regarding the tinnitus distress influence on AMLR components.

|           | THI score |       |              | THI score |       |              | THI score |       |              | THI score |       |
|-----------|-----------|-------|--------------|-----------|-------|--------------|-----------|-------|--------------|-----------|-------|
|           | ≥48       | <48   |              | ≥48       | <48   |              | ≥48       | <48   |              | ≥48       | <48   |
| Waveforms | 228       | 268   |              | 228       | 268   |              | 228       | 268   |              | 228       | 268   |
| Mean      | 19.54     | 18.77 |              | 29.33     | 27.98 |              | 41.03     | 39.7  |              | 50.51     | 48.76 |
| Median    | 18.84     | 18.83 | Na latency   | 28.17     | 27.5  | Nb latency   | 40.17     | 39.16 | Pb latency   | 50.17     | 48.83 |
| SD        | 4.15      | 4.26  |              | 4.87      | 4.23  |              | 6.87      | 6.13  |              | 7.57      | 7.2   |
| Minimum   | 10.5      | 10    | Pa latency   | 20.17     | 18.33 |              | 27.17     | 26.67 |              | 31.84     | 31.83 |
| Maximum   | 30        | 29.83 |              | 46        | 43.83 |              | 62.67     | 60.83 |              | 67.5      | 78.83 |
| Mean      | -0.45     | -0.33 |              | 0.47      | 0.36  |              | -0.4      | -0.32 |              | 0.29      | 0.2   |
| Median    | -0.4      | -0.29 | Na amplitude | 0.43      | 0.33  | Nb amplitude | -0.39     | -0.3  | Pb amplitude | 0.26      | 0.17  |
| SD        | 0.34      | 0.3   |              | 0.29      | 0.25  |              | 0.28      | 0.25  |              | 0.31      | 0.27  |
| Minimum   | -1.77     | -1.57 | Pa amplitude | -0.33     | -0.11 |              | -1.39     | -1.4  |              | -0.45     | -0.48 |
| Maximum   | 0.21      | 0.44  |              | 1.72      | 1.32  |              | 0.54      | 0.63  |              | 1.78      | 1.21  |

**Table S4.** Statistical differences regarding the tinnitus distress influence on ABR components.

|                  | Latency           |                       |                   | Amplitude             |                |                   |
|------------------|-------------------|-----------------------|-------------------|-----------------------|----------------|-------------------|
|                  | I                 | III                   | V                 | I                     | III            | V                 |
| Statistical Test | Welch's t-test    | t-test                | t-test            | Welch's t-test        | t-test         | t-test            |
| THI              | t(462.7) = -1.84, | t(465) = -3.71,       | t(491) = -3.09,   | t(368.26) = 3.64,     | t(465) = 1.73, | t(491) = 2.55,    |
| Score $\geq$ 48  | p = .066,         | <b>p = &lt;.001</b> , | <b>p = .002</b> , | <b>p = &lt;.001</b> , | p = .085,      | <b>p = .011</b> , |
| Vs               | 95% CI            | 95% CI                | 95% CI            | 95% CI                | 95% CI         | 95% CI            |
| Score<48         | [-0.12, 0]        | [-0.15, -0.05]        | [-0.21, -0.05].   | [0.02, 0.05]          | [-0.01, 0.05]  | [0.01, 0.04]      |
| Size effect      | d = 0.17          | d = 0.34              | d = 0.28          | d = 0.34              | d = 0.16       | d = 0.23          |

**Table S5.** Statistical differences regarding the tinnitus distress influence on AMLR components.

|                  | Latency        |                   |                                      |                                       | Amplitude           |                                         |                   |                                       |
|------------------|----------------|-------------------|--------------------------------------|---------------------------------------|---------------------|-----------------------------------------|-------------------|---------------------------------------|
|                  | Na             | Pa                | Nb                                   | Pb                                    | Na                  | Pa                                      | Nb                | Pb                                    |
| Statistical Test | t-test         | t-test            | t-test                               | t-test                                | t-test              | t-test                                  | t-test            | t-test                                |
| THI              | t(448) = 1.93, | t(452) = 3.17,    |                                      |                                       | t(448) = -4.05,     |                                         | t(452) = -3.26,   |                                       |
| Score $\geq$ 48  | p = .054,      | <b>p = .002</b> , | t(452) = 2.18,                       | t(452) = 2.51,                        | <b>p &lt;.001</b> , | t(452) = 4.43,                          | <b>p = .001</b> , | t(452) = 3.06,                        |
| Vs               | 95% CI         | 95% CI            | <b>p = .03</b> , 95% CI [0.12, 2.54] | <b>p = .012</b> , 95% CI [0.37, 3.12] | 95% CI              | <b>p &lt;.001</b> , 95% CI [0.06, 0.16] | 95% CI            | <b>p = .002</b> , 95% CI [0.03, 0.14] |
| Score<48         | [-0.02, 1.56]  | [0.51, 2.2]       |                                      |                                       | [-0.18, -0.06]      |                                         | [-0.13, -0.03]    |                                       |
| Size effect      | d = 0.18       | d = 0.3           | d = 0.21                             | d = 0.24                              | d = 0.38            | d = 0.42                                | d = 0.31          | d = 0.29                              |

**Table S6.** Descriptive statistics regarding the level of tinnitus distress on the components of the ABR waveforms in people with common hearing levels and gender.

|               |           | Normal Hearing |        |        |        | Mild Hearing Loss |        |        |        | Severe Hearing Loss |        |        |        |
|---------------|-----------|----------------|--------|--------|--------|-------------------|--------|--------|--------|---------------------|--------|--------|--------|
|               |           | Females        |        | Males  |        | Females           |        | Males  |        | Females             |        | Males  |        |
|               |           | THI≥48         | THI<48 | THI≥48 | THI<48 | THI≥48            | THI<48 | THI≥48 | THI<48 | THI≥48              | THI<48 | THI≥48 | THI<48 |
| I latency     | Waveforms | 22             | 26     | 24     | 32     | 76                | 56     | 67     | 109    | 12                  | 10     | 27     | 35     |
|               | Mean      | 1.4            | 1.41   | 1.45   | 1.5    | 1.47              | 1.49   | 1.54   | 1.59   | 1.32                | 1.54   | 1.57   | 1.64   |
|               | Median    | 1.38           | 1.44   | 1.45   | 1.55   | 1.48              | 1.48   | 1.52   | 1.57   | 1.42                | 1.42   | 1.58   | 1.58   |
|               | SD        | 0.18           | 0.25   | 0.31   | 0.33   | 0.23              | 0.29   | 0.43   | 0.42   | 0.35                | 0.57   | 0.32   | 0.36   |
|               | Min       | 1.02           | 0.75   | 0.75   | 0.72   | 0.85              | 0.85   | 0.75   | 0.72   | 0.7                 | 0.88   | 1.02   | 0.98   |
| III latency   | Max       | 1.68           | 1.82   | 2.25   | 2.32   | 2.45              | 2.32   | 2.48   | 2.5    | 1.78                | 2.45   | 2.25   | 2.5    |
|               | Mean      | 3.55           | 3.54   | 3.57   | 3.7    | 3.62              | 3.72   | 3.68   | 3.72   | 3.54                | 3.84   | 3.64   | 3.84   |
|               | Median    | 3.52           | 3.53   | 3.57   | 3.65   | 3.58              | 3.68   | 3.67   | 3.72   | 3.47                | 3.78   | 3.62   | 3.82   |
|               | SD        | 0.21           | 0.17   | 0.2    | 0.2    | 0.24              | 0.28   | 0.31   | 0.35   | 0.28                | 0.26   | 0.33   | 0.33   |
|               | Min       | 3.22           | 3.22   | 3.08   | 3.35   | 3.25              | 2.98   | 3.02   | 2.92   | 3.08                | 3.45   | 2.9    | 3.12   |
| V latency     | Max       | 4.02           | 4.05   | 4.08   | 4.35   | 4.38              | 4.5    | 4.45   | 4.48   | 4.02                | 4.32   | 4.28   | 4.48   |
|               | Mean      | 5.23           | 5.28   | 5.38   | 5.41   | 5.31              | 5.46   | 5.61   | 5.69   | 5.22                | 5.65   | 5.85   | 5.84   |
|               | Median    | 5.27           | 5.3    | 5.35   | 5.48   | 5.28              | 5.45   | 5.48   | 5.58   | 5.28                | 5.57   | 5.75   | 5.72   |
|               | SD        | 0.29           | 0.34   | 0.26   | 0.36   | 0.33              | 0.35   | 0.5    | 0.46   | 0.48                | 0.29   | 0.58   | 0.58   |
|               | Min       | 4.78           | 4.52   | 4.88   | 4.58   | 4.68              | 4.52   | 4.52   | 4.68   | 4.55                | 5.28   | 4.95   | 4.62   |
| I amplitude   | Max       | 5.82           | 5.87   | 6.08   | 6.18   | 6.35              | 6.35   | 6.58   | 6.95   | 5.98                | 6.15   | 6.82   | 7      |
|               | Mean      | 0.15           | 0.1    | 0.09   | 0.07   | 0.11              | 0.07   | 0.09   | 0.06   | 0.09                | 0.05   | 0.05   | 0.06   |
|               | Median    | 0.16           | 0.09   | 0.1    | 0.06   | 0.09              | 0.07   | 0.09   | 0.06   | 0.1                 | 0.05   | 0.05   | 0.06   |
|               | SD        | 0.11           | 0.11   | 0.12   | 0.07   | 0.14              | 0.09   | 0.08   | 0.07   | 0.08                | 0.07   | 0.08   | 0.07   |
|               | Min       | -0.06          | -0.13  | -0.18  | -0.14  | -0.07             | -0.18  | -0.11  | -0.15  | -0.05               | -0.05  | -0.14  | -0.07  |
| III amplitude | Max       | 0.46           | 0.37   | 0.33   | 0.2    | 0.8               | 0.27   | 0.42   | 0.33   | 0.21                | 0.14   | 0.21   | 0.25   |
|               | Mean      | 0.28           | 0.29   | 0.25   | 0.24   | 0.25              | 0.24   | 0.15   | 0.15   | 0.2                 | 0.11   | 0.13   | 0.12   |
|               | Median    | 0.28           | 0.29   | 0.23   | 0.23   | 0.24              | 0.22   | 0.14   | 0.14   | 0.22                | 0.13   | 0.09   | 0.08   |
|               | SD        | 0.09           | 0.1    | 0.08   | 0.12   | 0.17              | 0.11   | 0.1    | 0.11   | 0.08                | 0.11   | 0.12   | 0.11   |
|               | Min       | 0.12           | 0.1    | 0.14   | -0.05  | -0.19             | -0.03  | -0.07  | -0.05  | 0.07                | -0.12  | -0.08  | -0.06  |
| V amplitude   | Max       | 0.45           | 0.49   | 0.37   | 0.52   | 1.35              | 0.52   | 0.41   | 0.77   | 0.32                | 0.27   | 0.33   | 0.39   |
|               | Mean      | 0.21           | 0.23   | 0.24   | 0.18   | 0.24              | 0.24   | 0.19   | 0.18   | 0.21                | 0.14   | 0.16   | 0.14   |
|               | Median    | 0.22           | 0.21   | 0.23   | 0.17   | 0.24              | 0.24   | 0.19   | 0.16   | 0.2                 | 0.13   | 0.15   | 0.12   |
|               | SD        | 0.09           | 0.11   | 0.1    | 0.11   | 0.13              | 0.09   | 0.08   | 0.09   | 0.06                | 0.13   | 0.09   | 0.1    |
|               | Min       | 0.03           | 0.02   | 0.06   | -0.07  | -0.12             | 0.08   | 0.02   | -0.07  | 0.12                | -0.04  | -0.1   | -0.12  |
|               | Max       | 0.39           | 0.46   | 0.52   | 0.43   | 0.72              | 0.45   | 0.41   | 0.52   | 0.31                | 0.33   | 0.31   | 0.47   |

**Table S7.** Descriptive statistics regarding the level of tinnitus distress on the components of the AMLR waveforms in people with common hearing levels and gender.

|              | Normal Hearing |        |        |        | Mild Hearing Loss |        |        |        | Severe Hearing Loss |        |        |        |       |
|--------------|----------------|--------|--------|--------|-------------------|--------|--------|--------|---------------------|--------|--------|--------|-------|
|              | Females        |        | Males  |        | Females           |        | Males  |        | Females             |        | Males  |        |       |
|              | THI≥48         | THI<48 | THI≥48 | THI<48 | THI≥48            | THI<48 | THI≥48 | THI<48 | THI≥48              | THI<48 | THI≥48 | THI<48 |       |
| Na latency   | Waveforms      | 22     | 26     | 24     | 32                | 76     | 56     | 67     | 109                 | 12     | 10     | 27     | 35    |
|              | Mean           | 18.17  | 17.55  | 19.85  | 18.55             | 19.15  | 17.87  | 19.78  | 19.36               | 19.78  | 20.66  | 20.35  | 19.01 |
|              | Median         | 17.84  | 17     | 18.5   | 18.5              | 18.67  | 17.83  | 19.67  | 19.83               | 20     | 19.66  | 21.17  | 18.66 |
|              | SD             | 3.63   | 3.27   | 3.76   | 4.24              | 3.88   | 4.02   | 4.26   | 4.62                | 4.6    | 3.07   | 4.91   | 4.15  |
|              | Min            | 10.84  | 11.83  | 14.5   | 10.83             | 10.5   | 10     | 10.5   | 10                  | 10.5   | 17.83  | 10.84  | 11.83 |
| Pa latency   | Max            | 25.17  | 26.16  | 29.5   | 27.16             | 27.84  | 27.5   | 28.5   | 29.16               | 26.84  | 27.16  | 30     | 29.83 |
|              | Mean           | 28.36  | 27.14  | 30.89  | 28.2              | 28.53  | 27.87  | 29.64  | 28.22               | 29.2   | 27.2   | 29.8   | 28.03 |
|              | Median         | 27.67  | 27.16  | 28.17  | 28.83             | 27.84  | 27.16  | 28.84  | 27.83               | 29     | 27.16  | 29.5   | 27.5  |
|              | SD             | 3.01   | 3.54   | 7.04   | 3.98              | 4.91   | 3.88   | 4.44   | 4.56                | 3.47   | 3.47   | 4.97   | 4.74  |
|              | Min            | 23.5   | 18.33  | 23.17  | 19.5              | 20.5   | 22.16  | 20.84  | 18.83               | 24.17  | 20.5   | 20.17  | 18.83 |
| Nb latency   | Max            | 34.84  | 34.33  | 46     | 38.5              | 44.84  | 39.83  | 40.84  | 43.83               | 35.5   | 32.5   | 40.84  | 39.16 |
|              | Mean           | 42.84  | 39.16  | 41.3   | 41.13             | 40.82  | 39.97  | 41.58  | 39.59               | 39.42  | 39.05  | 39.63  | 38.87 |
|              | Median         | 42.67  | 37.83  | 38.84  | 39.83             | 40.5   | 39.75  | 40     | 39.5                | 37.5   | 38.16  | 40.17  | 39.16 |
|              | SD             | 6.22   | 4.79   | 8.88   | 6.94              | 6.54   | 6.98   | 6.71   | 5.92                | 6.5    | 5.14   | 6.87   | 5.94  |
|              | Min            | 29.84  | 31.5   | 31.84  | 26.67             | 27.17  | 26.83  | 28.5   | 26.67               | 32.17  | 32.16  | 27.84  | 28.5  |
| Pb latency   | Max            | 51.84  | 50.67  | 62.67  | 55.16             | 59.17  | 60.83  | 58.84  | 56.16               | 53.17  | 49.16  | 54.84  | 51.16 |
|              | Mean           | 53.84  | 47.74  | 50.67  | 50.23             | 50.71  | 48.68  | 50.51  | 49.09               | 49.78  | 50.27  | 48.27  | 46.91 |
|              | Median         | 56.17  | 47.5   | 49.5   | 49.83             | 50.84  | 47.5   | 49     | 49                  | 47.67  | 48.83  | 48.17  | 45.5  |
|              | SD             | 7.25   | 4.83   | 7.92   | 7.41              | 7.15   | 9.26   | 7.96   | 6.38                | 7.07   | 6.62   | 7.58   | 7.49  |
|              | Min            | 39.84  | 41.5   | 40.84  | 37.5              | 35.17  | 31.83  | 31.84  | 31.83               | 42.84  | 41.83  | 36.84  | 32.16 |
| Na amplitude | Max            | 64.5   | 56.67  | 65.84  | 64.83             | 66.5   | 78.83  | 67.5   | 63.16               | 62.84  | 64.5   | 62.17  | 61.16 |
|              | Mean           | -0.41  | -0.43  | -0.59  | -0.45             | -0.46  | -0.39  | -0.42  | -0.26               | -0.39  | -0.15  | -0.47  | -0.31 |
|              | Median         | -0.39  | -0.39  | -0.41  | -0.43             | -0.38  | -0.36  | -0.37  | -0.23               | -0.41  | -0.13  | -0.43  | -0.29 |
|              | SD             | 0.22   | 0.37   | 0.48   | 0.32              | 0.39   | 0.33   | 0.29   | 0.25                | 0.33   | 0.22   | 0.25   | 0.24  |
|              | Min            | -0.76  | -1.37  | -1.7   | -1.29             | -1.77  | -1.57  | -1.13  | -1.55               | -0.94  | -0.51  | -0.99  | -1.09 |
| Pa amplitude | Max            | 0.02   | 0.34   | -0.1   | 0.01              | 0.05   | 0.2    | 0.17   | 0.44                | 0.21   | 0.16   | 0.01   | 0.31  |
|              | Mean           | 0.5    | 0.45   | 0.56   | 0.49              | 0.52   | 0.4    | 0.45   | 0.31                | 0.38   | 0.28   | 0.37   | 0.31  |
|              | Median         | 0.46   | 0.45   | 0.45   | 0.43              | 0.49   | 0.36   | 0.43   | 0.3                 | 0.42   | 0.31   | 0.38   | 0.28  |
|              | SD             | 0.24   | 0.21   | 0.39   | 0.28              | 0.33   | 0.3    | 0.26   | 0.22                | 0.32   | 0.14   | 0.13   | 0.2   |
|              | Min            | 0.11   | 0.04   | 0.06   | 0.07              | -0.39  | -0.11  | -0.1   | -0.07               | -0.07  | 0.05   | 0.04   | -0.07 |
| Nb amplitude | Max            | 1.05   | 0.89   | 1.72   | 1.18              | 1.56   | 1.32   | 1.11   | 1.28                | 0.91   | 0.56   | 0.6    | 0.78  |
|              | Mean           | -0.41  | -0.44  | -0.39  | -0.46             | -0.48  | -0.32  | -0.37  | -0.28               | -0.44  | -0.34  | -0.3   | -0.26 |
|              | Median         | -0.41  | -0.45  | -0.36  | -0.4              | -0.47  | -0.29  | -0.37  | -0.27               | -0.45  | -0.35  | -0.29  | -0.25 |
|              | SD             | 0.28   | 0.22   | 0.24   | 0.3               | 0.31   | 0.23   | 0.24   | 0.24                | 0.38   | 0.13   | 0.25   | 0.22  |
|              | Min            | -0.99  | -1.15  | -0.86  | -1.4              | -1.39  | -1.02  | -0.93  | -1.19               | -1.07  | -0.54  | -0.85  | -0.95 |
| Pb amplitude | Max            | 0.06   | -0.14  | -0.02  | -0.03             | 0.12   | 0.1    | 0.54   | 0.63                | 0.08   | -0.13  | 0.3    | 0.18  |
|              | Mean           | 0.28   | 0.27   | 0.29   | 0.14              | 0.32   | 0.2    | 0.24   | 0.2                 | 0.33   | 0.29   | 0.29   | 0.19  |
|              | Median         | 0.27   | 0.22   | 0.26   | 0.13              | 0.24   | 0.21   | 0.23   | 0.15                | 0.4    | 0.25   | 0.28   | 0.18  |
|              | SD             | 0.19   | 0.39   | 0.3    | 0.27              | 0.35   | 0.28   | 0.31   | 0.25                | 0.35   | 0.19   | 0.23   | 0.22  |
|              | Min            | -0.14  | -0.45  | -0.37  | -0.4              | -0.26  | -0.48  | -0.45  | -0.34               | -0.36  | 0.03   | -0.24  | -0.23 |
|              | Max            | 0.5    | 1.03   | 0.81   | 0.82              | 1.78   | 1.1    | 1.33   | 1.21                | 0.86   | 0.65   | 0.73   | 0.79  |

**Table S8.** Statistical analyses regarding the level of tinnitus distress on the components of the ABR waveforms in people with common hearing levels and gender.

| t-test           | Normal Hearing       |                     |                     |                    |                  |                  |                  |
|------------------|----------------------|---------------------|---------------------|--------------------|------------------|------------------|------------------|
|                  | Latencies (females)  |                     |                     | latencies (males)  |                  |                  |                  |
|                  | I                    | III                 | V                   | I                  | III              | V                |                  |
|                  | THI                  | t(45) =             | t(46) =             | t(46) =            | t(52) = -0.52,   | t(53) =          | t(53.94) =       |
|                  | Score≥48             | 0.15,               | -0.04,              | 0.58,              | p = .607,        | -2.38,           | -0.29,           |
|                  | Vs                   | p = .878,           | p = .965,           | p = .567,          | 95% CI           | <b>p = .021,</b> | p = .776,        |
| Score<48         | 95% CI               | 95% CI              | 95% CI              | 95% CI             | 95% CI           | 95% CI           |                  |
|                  | [-0.12, 0.14]        | [-0.11, 0.11]       | [-0.13, 0.24]       | [-0.23, 0.13]      | [-0.24, -0.02]   | [-0.19, 0.14]    |                  |
| Statistical Test | t-test               | t-test              | t-test              | t-test             | t-test           | Welch's t-test   |                  |
| size effect      | d = 0.05             | d = 0.01            | d = 0.17            | d = 0.14           | d = 0.65         | d = 0.08         |                  |
| t-test           | Amplitudes (females) |                     |                     | Amplitudes (males) |                  |                  |                  |
|                  | I                    | III                 | V                   | I                  | III              | V                |                  |
|                  | THI                  | t(45) =             | t(46) =             | t(46) =            | t(52) =          | t(54) =          |                  |
|                  | Score≥48             | -1.4,               | 0.49,               | 0.61,              | 1.01,            | t(50.54) = 0.39, | 2.24,            |
|                  | Vs                   | p = .168,           | p = .625,           | p = .547,          | p = .317,        | p = .698,        | <b>p = .029,</b> |
|                  | Score<48             | 95% CI              | 95% CI              | 95% CI             | 95% CI           | 95% CI           | 95% CI           |
|                  | [-0.11, 0.02]        | [-0.04, 0.07]       | [-0.04, 0.07]       | [-0.03, 0.08]      | [-0.04, 0.07]    | [0.01, 0.12]     |                  |
| Statistical Test | t-test               | t-test              | t-test              | t-test             | Welch's t-test   | t-test           |                  |
| size effect      | d = 0.41             | d = 0.14            | d = 0.18            | d = 0.28           | d = 0.1          | d = 0.6          |                  |
| t-test           | Mild Hearing Loss    |                     |                     |                    |                  |                  |                  |
|                  | Latencies (females)  |                     |                     | Latencies (males)  |                  |                  |                  |
|                  | I                    | III                 | V                   | I                  | III              | V                |                  |
|                  | THI                  | t(124) =            | t(128) =            | t(129) =           | t(160) =         | t(157) =         | t(172) =         |
|                  | Score≥48             | -0.3,               | -2.23,              | -2.45,             | -0.78,           | -0.78,           | -1.15,           |
|                  | Vs                   | p = .763,           | <b>p = .028,</b>    | <b>p = .016,</b>   | p = .437,        | p = .438,        | p = .252,        |
| Score<48         | 95% CI               | 95% CI              | 95% CI              | 95% CI             | 95% CI           | 95% CI           |                  |
|                  | [-0.11, 0.08]        | [-0.19, -0.01]      | [-0.26, -0.03]      | [-0.19, 0.08]      | [-0.15, 0.07]    | [-0.23, 0.06]    |                  |
| Statistical Test | t-test               | t-test              | t-test              | t-test             | t-test           | t-test           |                  |
| size effect      | d = 0.05             | d = 0.39            | d = 0.43            | d = 0.13           | d = 0.13         | d = 0.18         |                  |
| t-test           | Amplitudes (females) |                     |                     | Amplitudes (males) |                  |                  |                  |
|                  | I                    | III                 | V                   | I                  | III              | V                |                  |
|                  | THI                  | t(116,49) = 2.22,   | t(128) =            | t(129) =           | t(160) =         | t(157) =         | t(172) =         |
|                  | Score≥48             | <b>p = .028,</b>    | 0.49,               | -0.02,             | 2.47,            | 0.17,            | 1.23,            |
|                  | Vs                   | 95% CI              | p = .627,           | p = .986,          | <b>p = .014,</b> | p = .863,        | p = .221,        |
|                  | Score<48             | 95% CI              | 95% CI              | 95% CI             | 95% CI           | 95% CI           | 95% CI           |
|                  | [0, 0.09]            | [-0.04, 0.07]       | [-0.04, 0.04]       | [0.01, 0.06]       | [-0.03, 0.04]    | [-0.01, 0.04]    |                  |
| Statistical Test | Welch's t-test       | t-test              | t-test              | t-test             | t-test           | t-test           |                  |
| size effect      | d = 0.4              | d = 0.09            | d = 0               | d = 0.4            | d = 0.03         | d = 0.19         |                  |
| t-test           | Severe Hearing Loss  |                     |                     |                    |                  |                  |                  |
|                  | Latencies (females)  |                     |                     | Latencies (males)  |                  |                  |                  |
|                  | I                    | III                 | V                   | I                  | III              | V                |                  |
|                  | THI                  | t(10,45) =          | t(20) =             | t(20) =            | t(56) =          | t(51) =          | t(60) =          |
|                  | Score≥48             | 0.98,               | 2.61,               | 2.43,              | -0.82,           | -2.15,           | 0.03,            |
|                  | Vs                   | p = .348,           | <b>p = .017,</b>    | <b>p = .025,</b>   | p = .415,        | <b>p = .036,</b> | p = .975,        |
| Score<48         | 95% CI               | 95% CI [0.06, 0.54] | 95% CI [0.06, 0.79] | 95% CI             | 95% CI           | 95% CI           |                  |
|                  | [-0.28, 0.72]        |                     |                     | [-0.26, 0.11]      | [-0.39, -0.01]   | [-0.29, 0.3]     |                  |
| Statistical Test | Welch's t-test       | t-test              | t-test              | t-test             | t-test           | t-test           |                  |
| size effect      | d = 0.5              | d = 1.12            | d = 1.04            | d = 0.22           | d = 0.6          | d = 0.01         |                  |
| t-test           | Amplitudes (females) |                     |                     | Amplitudes (males) |                  |                  |                  |
|                  | I                    | III                 | V                   | I                  | III              | V                |                  |
|                  | THI                  | t(18) =             | t(20) =             | t(12.67) =         | t(56) =          | t(51) =          | t(60) =          |
| Score≥48         | -1.09,               | -2.26,              | -1.46,              | -0.31,             | 0.26,            | 0.94,            |                  |
| Vs               | p = .29,             | <b>p = .035,</b>    | p = .169,           | p = .761,          | p = .792,        | p = .352,        |                  |

|  |                  |                         |                          |                         |                         |                         |                         |
|--|------------------|-------------------------|--------------------------|-------------------------|-------------------------|-------------------------|-------------------------|
|  | Score<48         | 95% CI<br>[-0.11, 0.04] | 95% CI<br>[-0.18, -0.01] | 95% CI<br>[-0.16, 0.03] | 95% CI<br>[-0.04, 0.03] | 95% CI<br>[-0.06, 0.07] | 95% CI<br>[-0.03, 0.07] |
|  | Statistical Test | t-test                  | t-test                   | Welch's<br>t-test       | t-test                  | t-test                  | t-test                  |
|  | size effect      | d = 0.50                | d = 0.97                 | d = 0.62                | d = 0.08                | d = 0.07                | d = 0.24                |

**Table S9.** Statistical analyses regarding the level of tinnitus distress on the components of the AMLR waveforms in people with common hearing levels and gender.

| Normal Hearing    |                      |                |                |                 |                    |                    |                  |                   |
|-------------------|----------------------|----------------|----------------|-----------------|--------------------|--------------------|------------------|-------------------|
|                   | Latencies (females)  |                |                |                 | Latencies (males)  |                    |                  |                   |
|                   | Na                   | Pa             | Nb             | Pb              | Na                 | Pa                 | Nb               | Pb                |
| t-test            | THI                  | t(39) = -0.57, | t(39) = -1.13, | t(39) = -2.13,  | t(23.54) = -2.97,  | t(51) = 1.15,      | t(30,51) = 1.62, | t(51) = 0.08,     |
|                   | Score≥48             | p = .574,      | p = .264,      | p = .04, 95%    | p = .007,          | p = .255, 95%      | p = .115,        | p = .937, 95%     |
|                   | Vs                   | 95% CI         | 95% CI         | CI              | 95% CI             | CI                 | 95% CI           | CI                |
|                   | Score<48             | [-2.83, 1.59]  | [-3.38, 0.95]  | [-7.16, -0.18]  | [-10.34, -1.86]    | [-0.97, 3.57]      | [-0.7, 6.09]     | [-4.2, 4.54]      |
|                   | Statistical Test     | t-test         | t-test         | t-test          | Welch's t-test     | t-test             | Welch's t-test   | t-test            |
|                   | size effect          | d = 0.18       | d = 0.36       | d = 0.68        | d = 1.04           | d = 0.32           | d = 0.45         | d = 0.02          |
|                   | Amplitudes (females) |                |                |                 | Amplitudes (males) |                    |                  |                   |
|                   | Na                   | Pa             | Nb             | Pb              | Na                 | Pa                 | Nb               | Pb                |
| t-test            | THI                  | t(39) = -0.25, | t(39) = -0.62, | t(39) = -0.33,  | t(37.12) = -0.1,   | t(51) = -1.21,     | t(51) = 0.77,    | t(51) = 0.94,     |
|                   | Score≥48             | p = .8,        | p = .538,      | p = .746,       | p = .924,          | p = .232, 95%      | p = .446,        | p = .352, 95%     |
|                   | Vs                   | 95% CI         | 95% CI         | 95% CI          | 95% CI             | CI                 | 95% CI           | CI                |
|                   | Score<48             | [-0.23, 0.18]  | [-0.19, 0.1]   | [-0.19, 0.13]   | [-0.19, 0.18]      | [-0.36, 0.09]      | [-0.11, 0.26]    | [-0.08, 0.23]     |
|                   | Statistical Test     | t-test         | t-test         | t-test          | Welch's t-test     | t-test             | t-test           | t-test            |
|                   | size effect          | d = 0.08       | d = 0.2        | d = 0.1         | d = 0.03           | d = 0.34           | d = 0.21         | d = 0.26          |
| Mild Hearing Loss |                      |                |                |                 |                    |                    |                  |                   |
|                   | Latencies (females)  |                |                |                 | Latencies (males)  |                    |                  |                   |
|                   | Na                   | Pa             | Nb             | Pb              | Na                 | Pa                 | Nb               | Pb                |
| t-test            | THI                  | t(110) = 1.72, | t(110) = 0.77, | t(110) = 0.66,  | t(110) = 1.31,     | t(161) = 0.57,     | t(164) = 1.98,   | t(112.58) = 1.21, |
|                   | Score≥48             | p = .088,      | p = .442,      | p = .51, 95%    | p = .194,          | p = .568, 95%      | p = .05,         | p = .231,         |
|                   | Vs                   | 95% CI         | 95% CI         | CI              | 95% CI             | CI                 | 95% CI           | 95% CI            |
|                   | Score<48             | [-0.2, 2.77]   | [-1.03, 2.35]  | [-1.69, 3.39]   | [-1.05, 5.1]       | [-1.02, 1.85]      | [-0.01, 2.85]    | [0.02, 3.96]      |
|                   | Statistical Test     | t-test         | t-test         | t-test          | t-test             | t-test             | t-test           | Welch's t-test    |
|                   | size effect          | d = 0.33       | d = 0.15       | d = 0.13        | d = 0.25           | d = 0.09           | d = 0.32         | d = 0.32          |
|                   | Amplitudes (females) |                |                |                 | Amplitudes (males) |                    |                  |                   |
|                   | Na                   | Pa             | Nb             | Pb              | Na                 | Pa                 | Nb               | Pb                |
| t-test            | THI                  | t(110) = -0.9, | t(110) = 2.03, | t(110) = -3.13, | t(110) = 1.96,     | t(115.37) = -3.64, | t(164) = 3.85,   | t(164) = -2.37,   |
|                   | Score≥48             | p = .37,       | p = .044,      | p = .002,       | p = .052,          | p < .001, 95%      | p < .001,        | p = .019, 95%     |
|                   | Vs                   | 95% CI         | 95% CI         | 95% CI          | 95% CI             | CI                 | 95% CI           | CI                |
|                   | Score<48             | [-0.2, 0.07]   | [0, 0.24]      | [-0.27, -0.06]  | [-0.01, 0.24]      | [-0.25, -0.07]     | [0.07, 0.22]     | [-0.17, -0.01]    |
|                   | Statistical Test     | t-test         | t-test         | t-test          | t-test             | Welch's t-test     | t-test           | t-test            |
|                   | size effect          | d = 0.33       | d = 0.15       | d = 0.13        | d = 0.25           | d = 0.09           | d = 0.32         | d = 0.32          |

|        |                             |               |                   |                  |                           |                |                 |                |               |
|--------|-----------------------------|---------------|-------------------|------------------|---------------------------|----------------|-----------------|----------------|---------------|
|        | size effect                 | d = 0.17      | d = 0.39          | d = 0.61         | d = 0.37                  | d = 0.59       | d = 0.61        | d = 0.38       | d = 0.13      |
|        | <b>Severe Hearing Loss</b>  |               |                   |                  |                           |                |                 |                |               |
|        | <b>Latencies (females)</b>  |               |                   |                  | <b>Latencies (males)</b>  |                |                 |                |               |
|        | Na                          | Pa            | Nb                | Pb               | Na                        | Pa             | Nb              | Pb             |               |
| t-test | THI                         | t(18) = 0.47, | t(19) = -1.31,    | t(19) = -0.14,   | t(19) = 0.16,             | t(59) = 1.16,  | t(59) = 1.42,   | t(59) = 0.46,  | t(59) = 0.7,  |
|        | Score $\geq$ 48             | p = .641,     | p = .207, 95%     | p = .89, 95%     | p = .873,                 | p = .252, 95%  | p = .161,       | p = .646, 95%  | p = .486, 95% |
|        | Vs                          | 95% CI        | CI                | CI               | 95% CI                    | CI             | 95% CI          | CI             | CI            |
|        | Score<48                    | [-3.02, 4.79] | [-5.2, 1.2]       | [-5.87, 5.14]    | [-5.86, 6.85]             | [-0.98, 3.66]  | [-0.72, 4.27]   | [-2.53, 4.04]  | [-2.52, 5.25] |
|        | Statistical Test            | t-test        | t-test            | t-test           | t-test                    | t-test         | t-test          | t-test         | t-test        |
|        | size effect                 | d = 0.22      | d = 0.58          | d = 0.06         | d = 0.07                  | d = 0.3        | d = 0.37        | d = 0.12       | d = 0.18      |
|        | <b>Amplitudes (females)</b> |               |                   |                  | <b>Amplitudes (males)</b> |                |                 |                |               |
|        | Na                          | Pa            | Nb                | Pb               | Na                        | Pa             | Nb              | Pb             |               |
| t-test | THI                         | t(18) = 1.77, | t(16.26) = -0.97, | t(14.18) = 0.89, | t(19) = -0.3,             | t(59) = -2.51, | t(56.9) = 1.56, | t(59) = -0.76, | t(59) = 1.67, |
|        | Score $\geq$ 48             | p = .094,     | p = .348,         | p = .39, 95%     | p = .768,                 | p = .015, 95%  | p = .124,       | p = .453, 95%  | p = .101, 95% |
|        | Vs                          | 95% CI        | 95% CI            | CI               | 95% CI                    | CI             | 95% CI          | CI             | CI            |
|        | Score<48                    | [-0.04, 0.52] | [-0.32, 0.12]     | [-0.15, 0.36]    | [-0.31, 0.23]             | [-0.28, -0.03] | [-0.02, 0.15]   | [-0.17, 0.08]  | [-0.02, 0.21] |
|        | Statistical Test            | t-test        | t-test            | t-test           | t-test                    | t-test         | Welch's t-test  | t-test         | t-test        |
|        | size effect                 | d = 0.81      | d = 0.39          | d = 0.35         | d = 0.13                  | d = 0.65       | d = 0.4         | d = 0.19       | d = 0.43      |

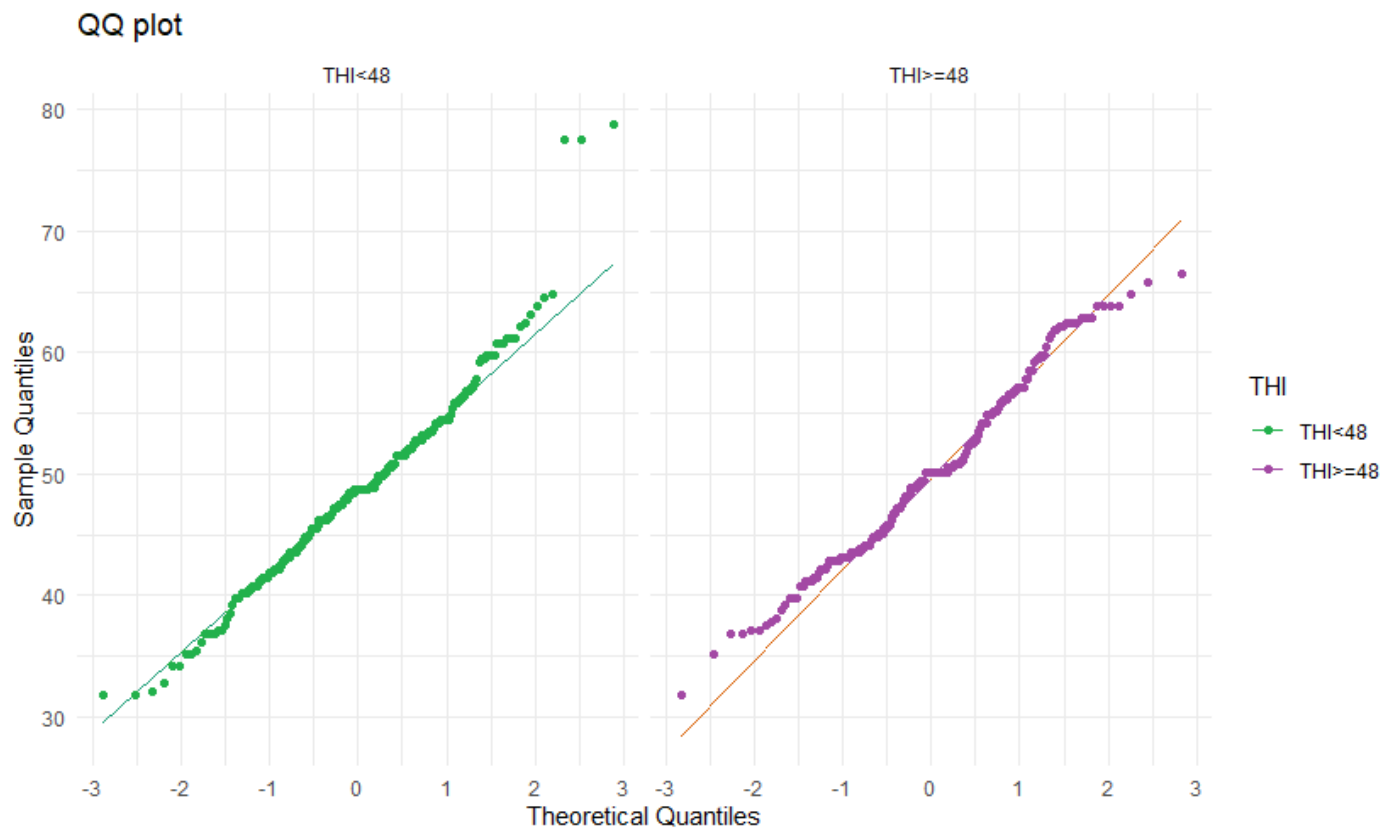

**Figure S1.** The QQ plot was used to test whether the dependent variable “Pb latency” followed a normal distribution.



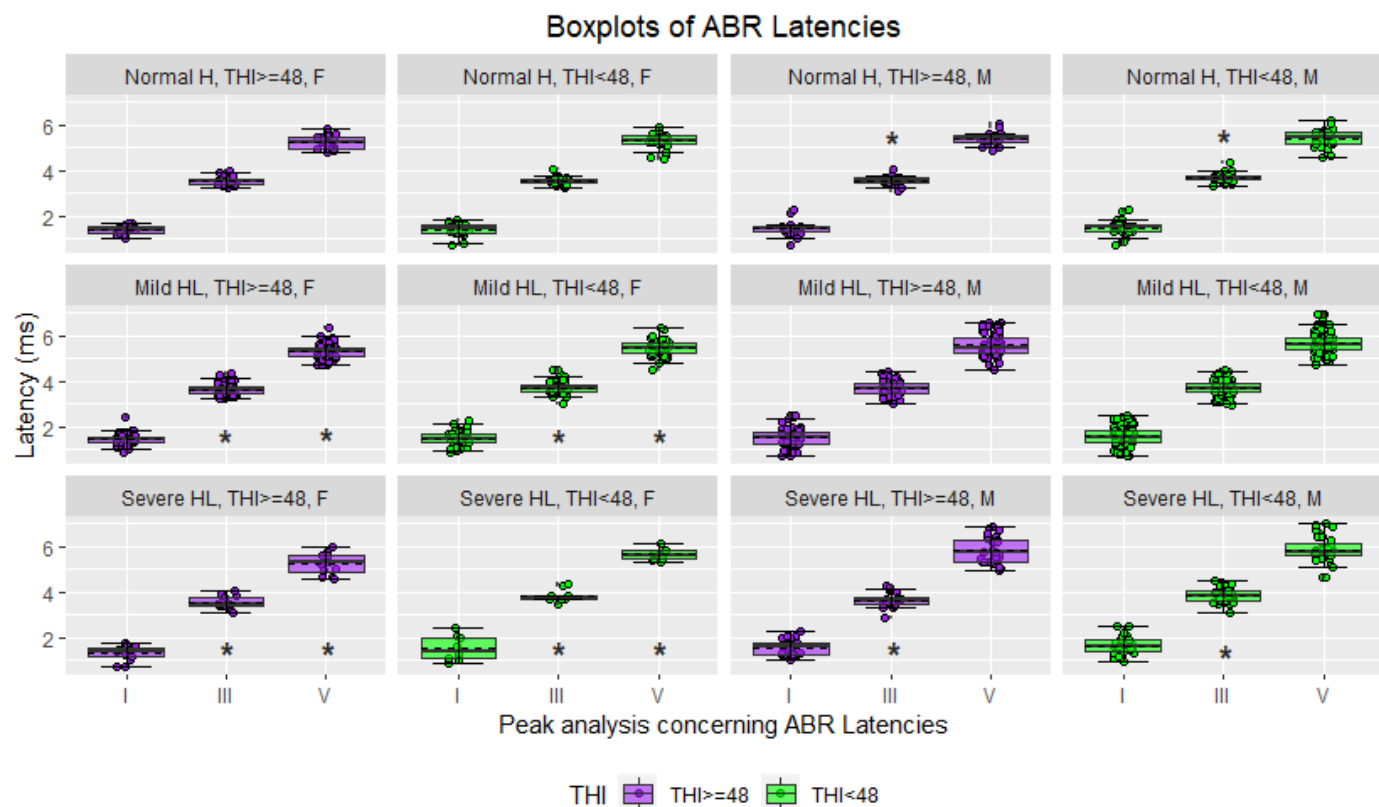

**Figure S2.** Boxplots of ABR waveforms latencies based on tinnitus distress in people with common hearing levels and gender (in purple: severe/high tinnitus distress; in green: mild/moderate tinnitus distress; H=hearing; HL=hearing loss; M=males and F=females; asterisks indicate significance: \*  $p$ -value  $\leq 0.05$ ; \*\*  $p$ -value  $\leq 0.01$ ; \*\*\*  $p$ -value  $\leq 0.001$ ).

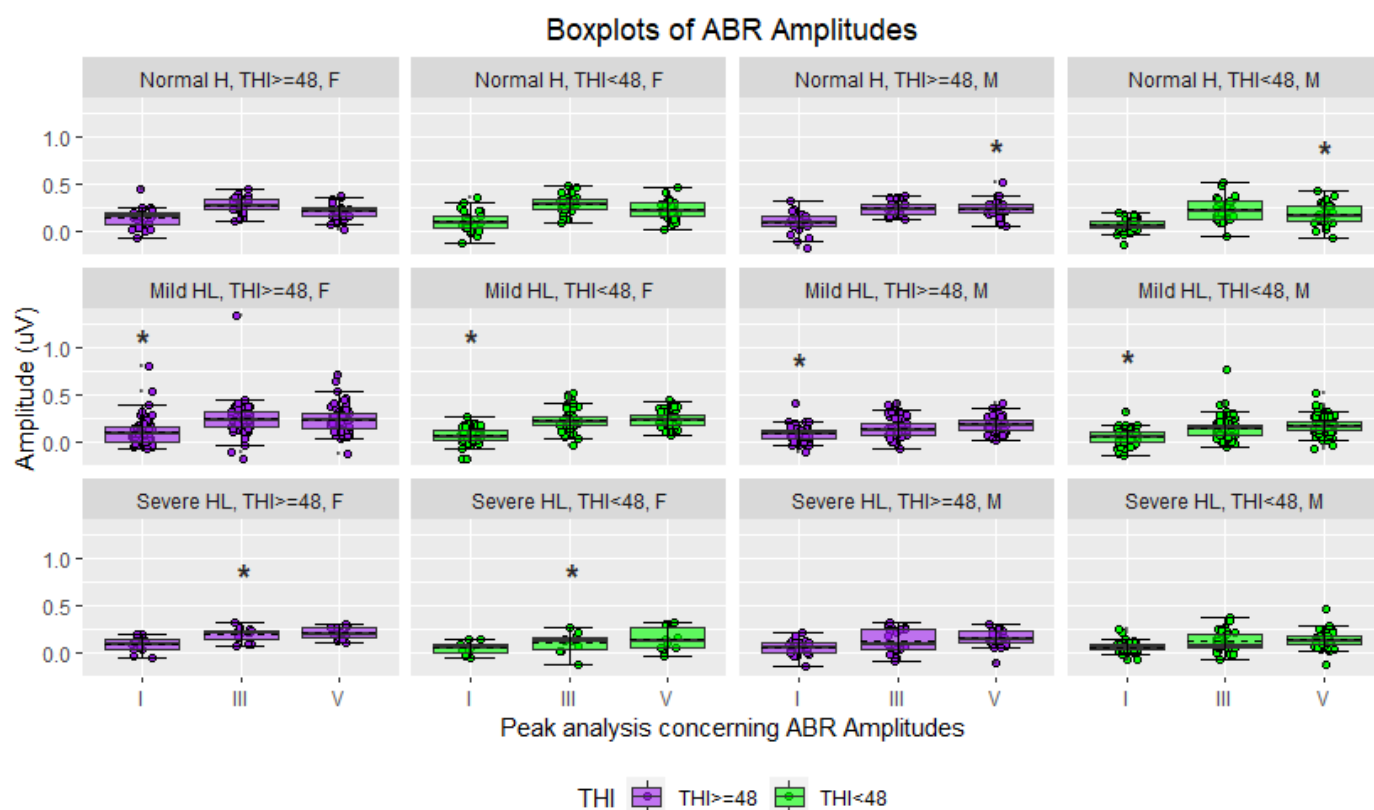

**Figure S3.** Boxplots of ABR waveforms amplitudes based on tinnitus distress in people with common hearing levels and gender (in purple: severe tinnitus distress; in green: mild tinnitus distress; H=hearing; HL=hearing loss; M=males and F=females; asterisks indicate significance: \*  $p$ -value  $\leq 0.05$ ; \*\*  $p$ -value  $\leq 0.01$ ; \*\*\*  $p$ -value  $\leq 0.001$ ).

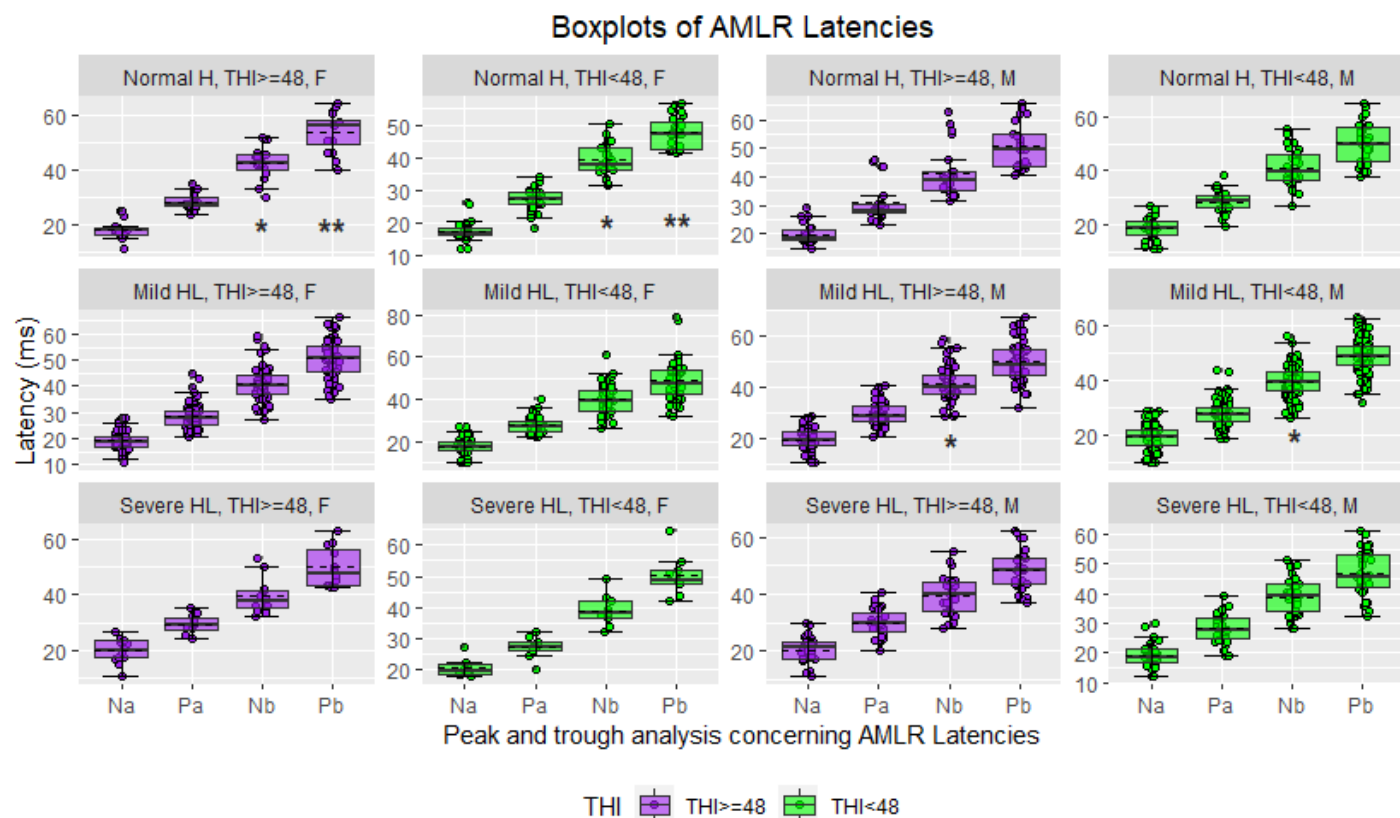

**Figure S4.** Boxplots of AMLR waveforms latencies based on tinnitus distress in people with common hearing levels and gender (in purple: severe/high tinnitus distress; in green: mild/moderate tinnitus distress; H=hearing; HL=hearing loss; M=males and F=females; asterisks indicate significance: \*  $p$ -value  $\leq 0.05$ ; \*\*  $p$ -value  $\leq 0.01$ ; \*\*\*  $p$ -value  $\leq 0.001$ ).

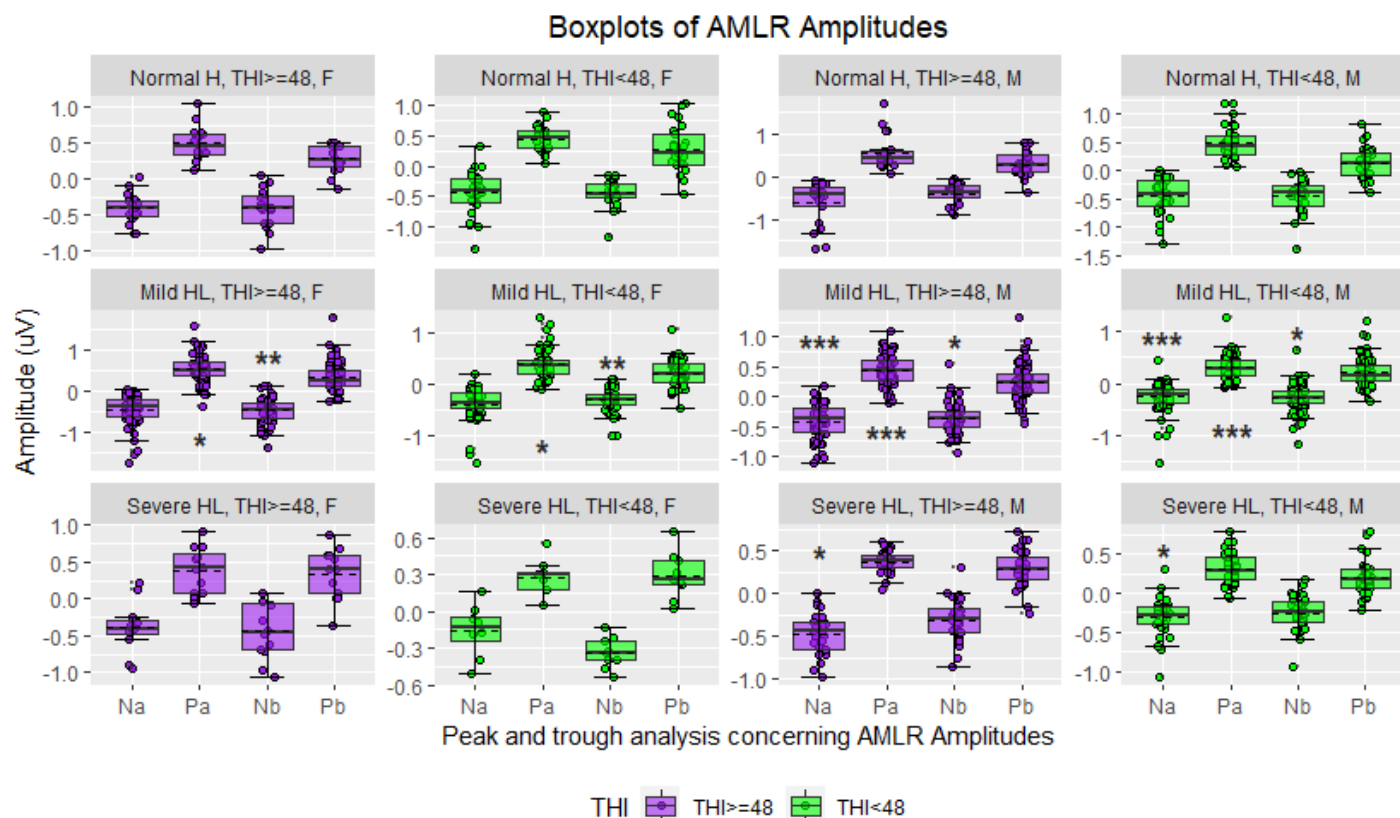

**Figure S5.** Boxplots of AMLR waveforms amplitudes based on tinnitus distress in people with common hearing levels and gender (in purple: severe/high tinnitus distress; in green: mild/moderate tinnitus distress; H=hearing; HL=hearing loss; M=males and F=females; asterisks indicate significance: \*  $p$ -value  $\leq 0.05$ ; \*\*  $p$ -value  $\leq 0.01$ ; \*\*\*  $p$ -value  $\leq 0.001$ ).
